# Supplementary material for: Balloon borne aerosol-cloud interaction studies (BACIS): New observational techniques to understand and quantify aerosol effects on clouds
Source: Copernicus journal article supplement (doi:10.5194/amt-2021-410), 2021-12-22
Supplement: Supplementary file 1 [file amt-2021-410-supplement.pdf]

## **Supplementary material**

### **Balloon borne aerosol-cloud interaction studies (BACIS):**

### **New observational techniques to understand and quantify**

### **aerosol effects on clouds**

Varaha Ravi Kiran<sup>1</sup>, Madineni Venkat Ratnam<sup>1</sup>, Masatomo Fujiwara<sup>2</sup>, Herman Russchenberg<sup>3</sup>, Frank G Wienhold<sup>4</sup>, Bomidi Lakshmi Madhavan<sup>1</sup>, Mekalathur Roja Raman<sup>5</sup>, Renju Nandan<sup>1</sup>, Sivan Thankamani Akhil Raj<sup>1</sup>, Alladi Hemanth Kumar<sup>1</sup>, Saginela Ravindra Babu<sup>1</sup>

<sup>1</sup>National Atmospheric Research Laboratory (NARL), Gadanki, 517 112, India

<sup>2</sup>Faculty of Environmental Earth Science, Hokkaido University, Sapporo, 060-0810, Japan

<sup>3</sup>Department of Geoscience and Remote Sensing, Delft University of Technology, Delft, 2628CD, The Netherlands

<sup>4</sup>Institute of Atmospheric and Climate Science (IAC), Universitaetstrasse 16, Zurich, 8092, Switzerland

<sup>5</sup>Department of Physics, Sri Venkateswara University, Tirupati, 517 502, India

*Correspondence to:* Ravi Kiran. V (ravikiranv@narl.gov.in)

Supplementary Figures:

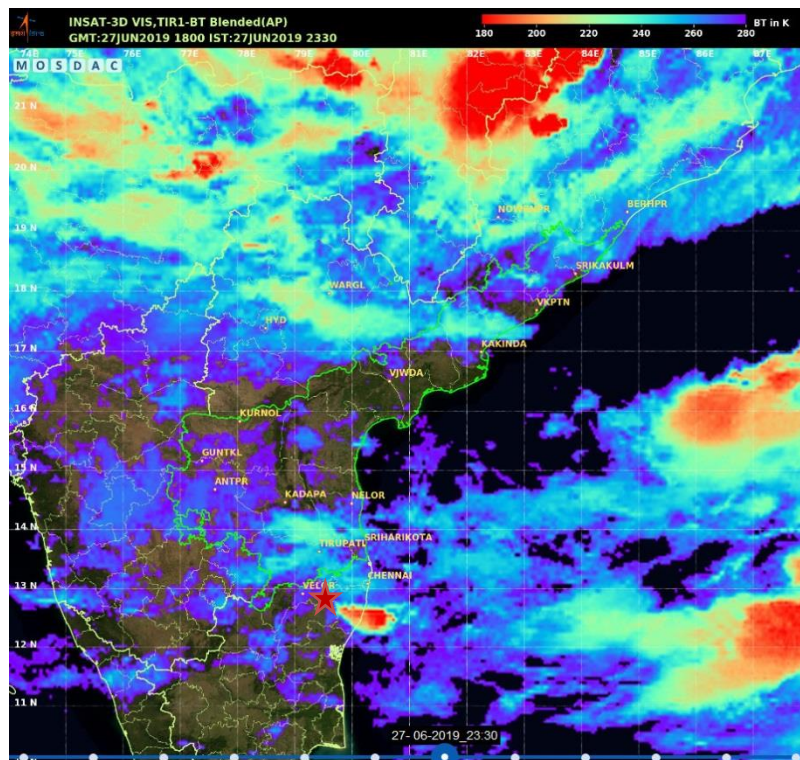

**Figure S1.** Blended image of Brightness Temperature (BT) derived using TIR1 and VIS channels of INSAT-3D imager. Image courtesy: MOSDAC (<https://www.mosdac.gov.in/gallery-products>). A wine red color star shown in the image represents the location of launch site (Gadanki; 13.45° N; 79.2° E).

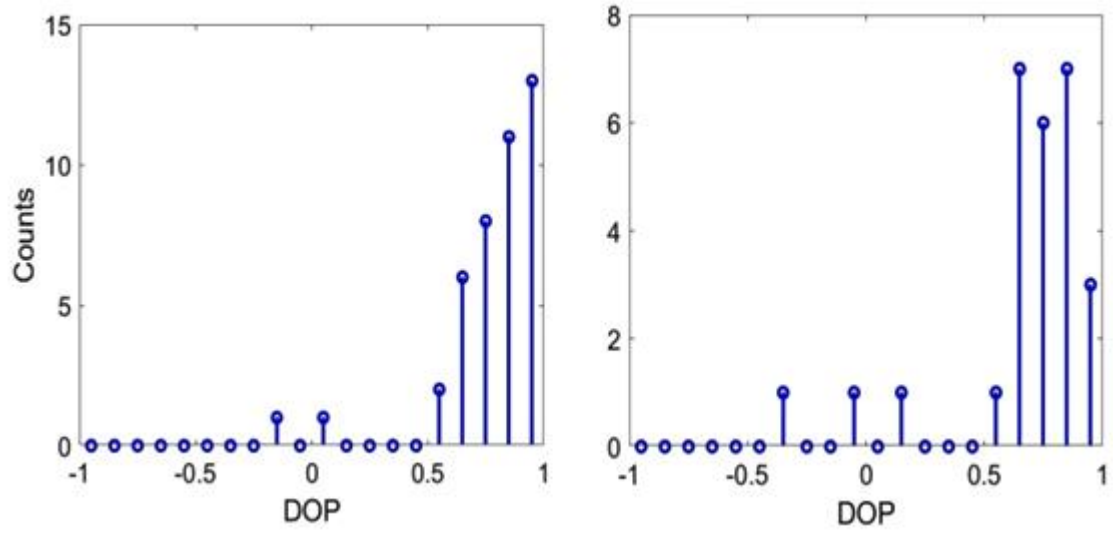

**Figure S2.** The distribution of DOP of super cooled clouds found on sounding held on 27 June 2019 at 1800 UTC. The left panel represents the super cooled cloud at the lower troposphere (5.1-5.5 km) and right panel in the mid-troposphere (8.6-9 km).

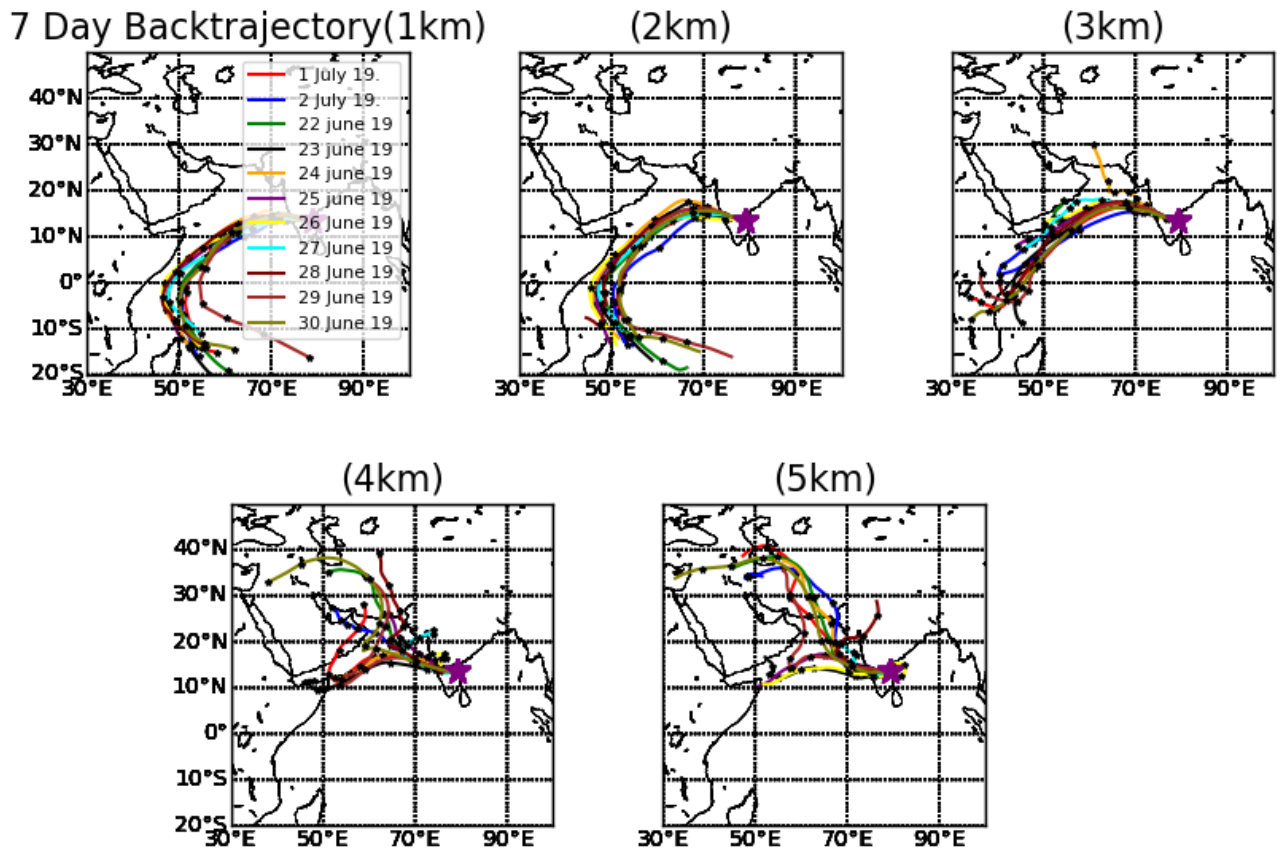

**Figure S3.** Hysplit 7-day back trajectories for 5 days before and after the launch date (27 Jun 2019 18 UTC) shown in different colors. The trajectories ending at every one kilometre altitude from 1 to 5 km over launch location (Gadanki; 13.45° N; 79.2° E) are shown in separate panels.

\*\*\*\*
